# Supplementary material
Source: Research Square preprint supplement (doi:10.21203/rs.3.rs-9364321/v1)
Supplement: Supplementary file 1 [file dec1eacbcd65938c0dc14c25.docx]

**Supplementary Materials**

***Lacticaseibacillus* *paracasei* WiKim0110 Protects Against Alcohol-Induced Gut-Liver Axis Injury via Mucus Barrier Reinforcement and Reg3g Induction**

Min Ji Lee1,3, Mi-Ja Jung2, Jisu Lee2, Sohee Nam2, Yeon Bee Kim2, Yujin Kim2, Misun Yun1, Tae Woong Whon2, Chang-Su Na4, Yanghee You4, Hong-Seok Son5, Che Ok Jeon3*, Se Hee Lee1*

1Kimchiome Bio-resources Research Group, World Institute of Kimchi, Gwangju, 61755, Republic of Korea

2Intelligent Fermentation Research Group, World Institute of Kimchi, Gwangju, 61755, Republic of Korea

3Department of Life Science, Chung-Ang University, Seoul, 06974, Republic of Korea

4College of Korean Medicine, Dongshin University, Naju, Republic of Korea

5Department of Biotechnology, College of Life Sciences and Biotechnology, Korea University, Seoul, Republic of Korea

*Correspondence and requests for materials should be addressed to Se Hee Lee (leesehee@wikim.re.kr) and Che Ok Jeon (cojeon@cau.ac.kr).

†These authors have contributed equally to this work.

**
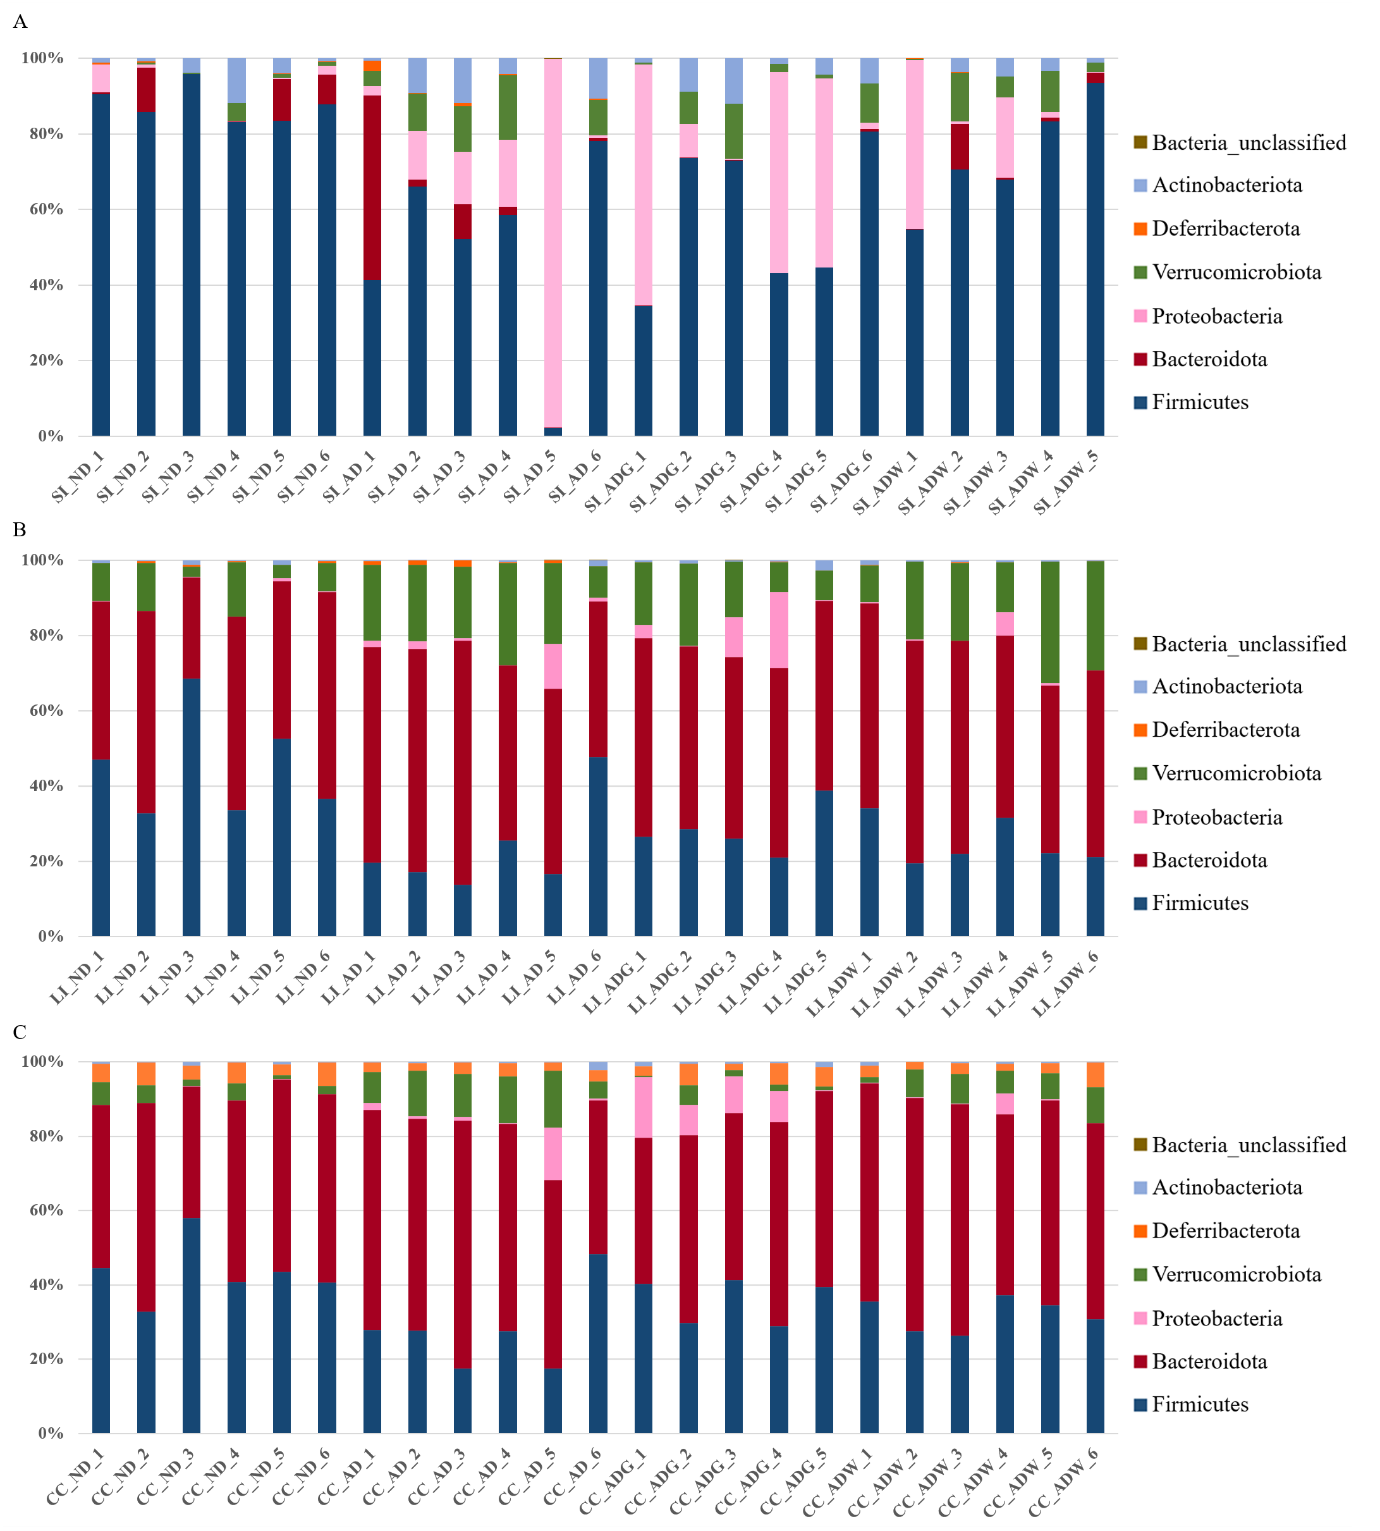
**

**Supplementary Figure S1. Phylum-level microbial composition across intestinal regions in individual samples.** Stacked bar plots represent the relative abundance of gut microbiota at the phylum level in individual samples from the small intestine (SI), large intestine (LI), and cecum (CC). Each bar corresponds to a single sample. ND, normal diet; AD, alcohol diet; ADG, alcohol diet + *Lacticaseibacillus* *rhamnosus* GG; ADW, alcohol diet + *Lacticaseibacillus* *paracasei* WiKim0110. Taxa with relative abundances lower than 3% were grouped into the “Others” category for visualization.

**
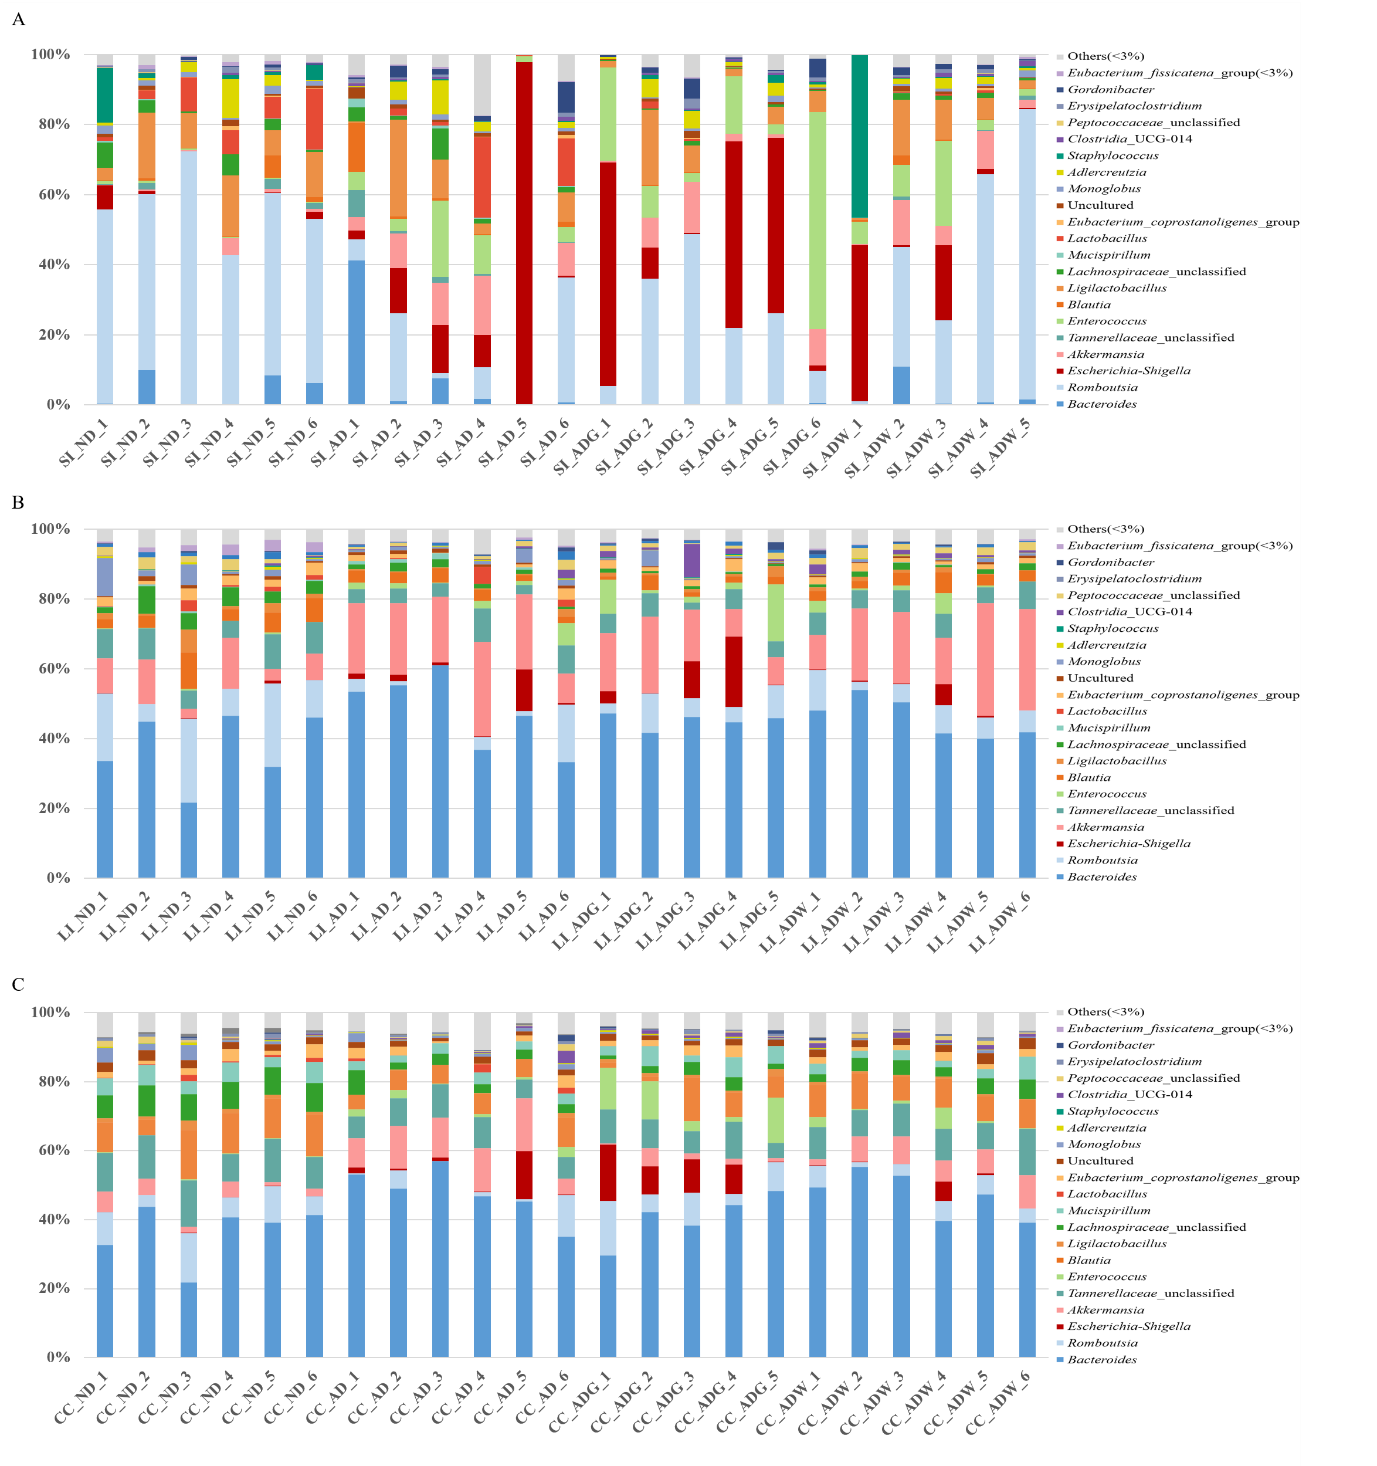
**

**Supplementary Figure S2. Genus-level microbial composition across intestinal regions in individual samples.** Stacked bar plots represent the relative abundance of gut microbiota at the genus level in individual samples from the small intestine (SI), large intestine (LI), and cecum (CC). Each bar corresponds to a single sample. ND, normal diet; AD, alcohol diet; ADG, alcohol diet + *Lacticaseibacillus* *rhamnosus* GG; ADW, alcohol diet + *Lacticaseibacillus* *paracasei* WiKim0110. Genera with relative abundances lower than 3% were grouped into the “Others” category for visualization.
